# Supplementary material
Source: ML conference proceedings conference paper supplement (https://openreview.net/forum?id=SouroWC5Un)
Supplement: supplementary_material [file attachment]

---

# Doubly Robust Peer-To-Peer Learning Protocol

---

Anonymous Author(s)

Affiliation

Address

email

## Abstract

Collaborative machine learning (ML) approaches are widely used to enable institutions to learn better models from distributed data. While collaborative approaches to learning intuitively protect user data, they remain vulnerable to either the server or clients deviating from the protocol, or both. Indeed, because the protocol is asymmetric, a malicious server can abuse its power to reconstruct client data points. Conversely, malicious clients can corrupt learning with malicious updates. Thus, both clients and servers require a guarantee when the other cannot be trusted to fully cooperate. In this work, we propose a peer-to-peer (P2P) learning scheme that is *doubly robust*: secure against malicious servers and robust to malicious clients. Our core contribution is a generic framework that transforms any (compatible) algorithm for robust aggregation of model updates to the setting where servers and clients can act maliciously. Finally, we demonstrate the computational efficiency of our approach even with 1-million parameter models trained by 100s of peers on standard datasets.

## 1 Introduction

To leverage data that is located across different clients, service providers increasingly resort to collaborative forms of distributed machine learning. Rather than centralize the data on a single *server*, data remains on the owner’s device(s) also known as *clients*, which could be a consumer’s phone or bank/hospital’s local data center. Take the canonical example of federated learning (FL) [27]. Rather than share data, clients instead send model updates to the server. Our work caters to settings where neither clients nor servers can be entirely trusted to faithfully participate in the Collaborative Learning (CL) protocol. For example, consider if a group of banks wished to learn a better fraud detection model. Banks may not be able to directly share data [11] and further *because banking is a competitive industry, it must be assumed that banks will deviate from the protocol if it serves their interest*.

First, malicious server banks may breach the intuitive confidentiality of CL. A long line of work [6, 7, 17, 30, 35, 40, 41, 43] has shown that when the server acts maliciously, it can, for instance, construct model parameter values that exactly extract client data from (even aggregated) model updates. To protect client data from servers acting maliciously, it is thus paramount to design approaches to CL where no single server can have full control over the orchestration of the protocol. On the other hand, malicious client banks may entirely prevent learning by submitting poor updates. This may be intentional as in a model poisoning attacks [1, 4, 37, 38] or unintentional if their dataset contained malformed data. Though a separate line of work [18, 19, 22, 23, 25, 31, 39] has studied how to robustly learn in the face of malicious updates (or data), there are none that have studied how to

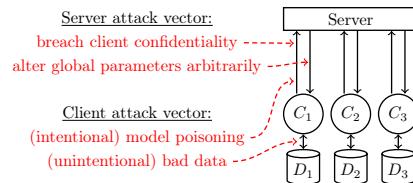

Figure 1: **Motivation for P2P Learning.** Current collaborative learning approaches are vulnerable to both client (denoted as  $C$  with data  $D$ ) and server attack vectors. Our framework tackles all of these vulnerabilities simultaneously.

integrate such robust learning algorithms within a protocol that is secure to malicious servers. In this work, we design the first scheme that is *doubly robust* to the harms of both malicious server(s) and clients, which are shown in Figure 1.

We observe that asymmetric power is the fundamental requirement for malicious servers to breach user data privacy. Thus, we design a fully-decentralized peer-to-peer (P2P) learning protocol where each participant (e.g., bank), or *peer* herein, can equally contribute to the role of the server aggregating updates (and of a client computing updates). Further, we ensure that no single peer has the power to orchestrate the protocol—instead, we elect a committee of peers to perform the aggregation at any given training round in a way that requires no central or trusted third party (see Section 3 for the full threat model). On the other hand, there is now a greater need for protection against malicious clients as the distributed nature may increase the chances of intentional poisoning or bad data quality interfering with learning (e.g., due to fewer resources among some banks and/or competitive advantages). Thus, we ensure that our protocol can efficiently integrate with classical approaches for robustness against malicious clients, such as RSA [25], FL Trust (FLT) [10], or Centered Clipping (CC) [22]. Importantly, our work generalizes the setups of these works and introduces the general framework that adapts any (compatible) algorithm for robust aggregation of model updates to settings where servers and clients may behave maliciously.

To achieve this, our approach builds on cryptographic multi-party computation (MPC) protocols. This allows peers to collectively emulate the server’s role while being robust against the collusion of a subset of these peers that may act maliciously. However, naively combining these with (insecure) robust aggregation techniques incurs prohibitive overhead because the server computation for robust aggregation, which must be securely computed in MPC, is almost always of a complexity that leads to a high multiplicative slowdown. We design a framework that modularizes the processing steps of robust aggregation so as to select the most suitable cryptographic building blocks for each one, leading to significant computational improvements. One such improvement is our proposed *computational surjectivity*. We show that aggregation algorithms with component functions satisfying this property can efficiently obtain security while still guaranteeing robustness against malicious peers; we also show that existing robustness algorithms satisfy this property, or can be tailored to do so.

To summarize, our contributions are the following:

1. We provide the first collaborative learning protocol that operates under the malicious threat model and is robust to both malicious clients and servers. We prove its cryptographic security, providing the necessary security guarantees.
2. We design our protocol as a generic compiler that can convert broad categories of robust aggregation algorithms to our doubly robust P2P security model efficiently. This modular approach enables practitioners to benefit from our improved security model while selecting the most appropriate model poisoning defense for their use case. To demonstrate our framework’s flexibility, we generate malicious-secure protocols for three existing robust aggregation algorithms. We show empirically that the generated protocols retain their robustness guarantees.
3. We demonstrate the computational efficiency of our protocols. We benchmark our protocols up to 1 million parameter models, and thousands of peers. For example, we show that the aggregation step of our malicious-secure implementation of robust aggregation with RSA [25] obtains a per-round CPU time of roughly 46 seconds with  $10^5$  parameters when trained by 1000 peers.

## 2 Related Work

Federated learning is perhaps the most studied collaborative learning framework [21, 28]. Most related to ours are variants based on Secure Aggregation (SecAgg) [8] that provide confidentiality of gradient transmission. However, existing work does not provide robust aggregation within SecAgg and is focused on the single-server setting, or additionally on their use for tighter differential privacy guarantees [12, 20]. In contrast, we focus solely on confidentiality in the distributed server setting with robust aggregation. Other works include CaPC [13] but this requires a trusted third party to reduce the computational overhead. We make no such assumptions. In Swarm Peer-2-Peer learning [36], participants can dynamically join or leave the collaboration and are enrolled via a Blockchain smart contract. There is no central party and each per-round server is dynamically elected via Blockchain smart contracts. Crucially, Swarm Learning supports neither secure (confidentiality-preserving) nor robust aggregation—it uses standard parameter averaging.

|                         | PROPERTY  | UPDATE                  | MALICIOUS                                     | MALICIOUS                                         | AGGREGATION                                          | ROBUST         |
|-------------------------|-----------|-------------------------|-----------------------------------------------|---------------------------------------------------|------------------------------------------------------|----------------|
|                         | PREVENTED | CONFIDENTIALITY         | CLIENTS                                       | SERVER                                            | COMMITTEE                                            | AGGREGATION    |
| METHOD                  | ATTACKS   | PLAINTEXT<br>INSPECTION | POISONING OR<br>BACKDOORING<br>[1, 4, 37, 38] | GRADIENT<br>INVERSION<br>[16, 41, 30, 35, 40, 41] | DATA<br>RECONSTRUCTION<br>[6, 7];<br>DEGRADE UTILITY | MALFORMED DATA |
| SECAGG v1 [8]           |           | ✓                       | ✗                                             | ✗                                                 | ✗                                                    | ✗              |
| SECAGG v2 [3]           |           | ✓                       | ✗                                             | ✗                                                 | ✗                                                    | ✗              |
| CAPC [13]               |           | ✓                       | ✗                                             | ✗                                                 | ✓                                                    | ✗              |
| SWARM P2P LEARNING [36] |           | ✗                       | ✗                                             | ✗                                                 | ✓                                                    | ✗              |
| BISCOTTI [32]           |           | ✓                       | ✗                                             | ✗                                                 | ✓                                                    | **             |
| EIFFEL MS [14]          |           | ✓                       | ✓                                             | ✓                                                 | ✗                                                    | *              |
| ACORN MS [2]            |           | ✓                       | ✓                                             | ✓                                                 | ✗                                                    | *              |
| DR-P2P SHS (OURS)       |           | ✓                       | ✗                                             | ✗                                                 | ✓                                                    | ✓              |
| DR-P2P MS (OURS)        |           | ✓                       | ✓                                             | ✓                                                 | ✓                                                    | ✓              |

Table 1: **Comparison of Security Models between Aggregation Protocols.** Robust aggregation provides protection against data poisoning by clients in the collaboration protocol. Update confidentiality guarantees that an individual updated from a client is not revealed. SHS denotes Semi-Honest Security while MS is Malicious Security. \*Guarantees data integrity, not robust aggregation of updates. \*\*Only under a single robust aggregation protocol.

Biscotti [32] incorporates robustness to poisoning by combining Multi-Krum [5] and secure aggregation through Shamir secret-sharing. Its core parts are a verification committee that runs robust update selection, and aggregation committee that computes the final model update. However, Biscotti only guarantees security in the semi-honest setting and is solely compatible with Multi-Krum, which is not always the preferable robustness algorithm [22]. Blockchain is also used as an alternative to the centralized aggregator in FL to deal with malicious participants or servers in [42]. The initial model is uploaded on the blockchain following which the participants train local models, then sign on hashes with their private keys, and upload the locally trained models to the blockchain. The validity of the uploaded models is verified with digital signatures and Multi-Krum. Algorand is used as the consensus algorithm in the blockchain system to update the global model. However, it uses a single leader for each training round and is compatible only with Multi-Krum.

Konstantinov and Lampert [24] present a distributed robust learning procedure that allows for robust learning from untrusted sources. Distributed Robust Learning (DRL) [15] is another approach to robust learning which uses a divide and conquer strategy. However, none of the papers achieves the two notions of robustness at the same time. Closest to our work are those that look to combine data integrity and confidentiality (security) [2, 14]. However, these works are crucially different from ours in that they perform checks on the underlying data of each client, not the update—then, these protocols drop clients with poor data. Because these approaches operate over a different input, they may be used simultaneously with ours.

### 3 Threat Model

Collaborative learning is conducted among a set of parties performing one of two roles: a *client* (or *worker*) who performs learning on a repository of local data or a *server* that aggregates the many client updates. We consider a malicious threat model for collaborative learning where both roles may be corrupted, and adversarial parties can perform arbitrary actions to interfere with the learning process. In particular, parties may act as:

- Malicious Clients** who can attempt to: (1) lower the quality of the trained model by sending distorted model updates, which may occur (a) intentionally as in model poisoning attacks, or (b) unintentionally due to errors in computation, skewed, or incorrect local data sets; (2) steal information about the other peers' data, *i.e.*, break confidentiality, *e.g.*, by colluding with other malicious peers and sharing the transcripts of the protocol execution.
- Malicious Servers** who can strive to (1) reconstruct individual data points from the clients' updates, thus breaking data confidentiality, which can be achieved by arbitrarily modifying model parameters or colluding with other peers (Servers or Clients), (2) degrade the fidelity of the shared model by omitting updates from selected clients as well as intentionally computing incorrect or even malicious aggregates of model updates.

### Trusted Single-Server Robust Aggregation

**Public Functions:** Single-server robust aggregation algorithms are defined by three functions:

- $F^C(\cdot)$  – client-side update computation
- $F^P(\cdot)$  – server-side update preprocessing
- $F^R(\cdot)$  – server-side update aggregation.

**Input:** Global parameters  $w$  from the previous round. Each client  $P_i$  has input data; all participants have local state  $st$ .

**Client update:**

1. Each client  $P_i$  computes  $u_i \leftarrow F^C(\text{data}, st, w)$  and sends update  $u_i$  to the server.

**Server preprocessing:**

2. For each  $i \in [m]$ , the server obtains  $v_j$  for all  $j \in S_i$  and computes  $v_i \leftarrow F^P(\{u_j\}_{j \in S_i})$ .

**Server update:**

3. Server computes  $w \leftarrow F^R(\{v_i\}_{i \in [m]})$  and sends  $w$  to all clients.

Figure 2: **Template for single-server robust aggregation.**

130 **Problem Setup.** To construct a collaborative learning protocol that is *doubly robust* against both  
 131 malicious clients and servers, we must decentralize the task of update aggregation. Accordingly, P2P  
 132 Learning is conducted among a set of *participants* or peers, who may be assigned take on the role of  
 133 client or server.

## 134 4 Doubly Robust Framework

135 Our framework efficiently lifts the robust aggregation algorithms (*e.g.*, aforementioned RSA, FLT,  
 136 or CC) to the P2P learning setting with guaranteed malicious-secure protocol fidelity. This security  
 137 model guarantees confidentiality and protocol fidelity against peers that may take arbitrary actions  
 138 to disrupt the P2P learning, while retaining the model fidelity guarantees of a robust aggregation  
 139 algorithm. Indeed, we previously mentioned that many algorithms provide model fidelity against  
 140 poisonous adversaries in the single-server setting [5, 18, 22, 23, 25, 31]. Each algorithm makes  
 141 different assumptions about the threat model, *e.g.*, how many times a given malicious client can  
 142 participate, what sort of malicious update they send, what the underlying data distribution is, etc. Thus,  
 143 rather than pinning our framework on a single robustness algorithm, we propose a modular design  
 144 that encompasses a broad class of such robust aggregation algorithms designed for the single-server  
 145 setting.

### 146 4.1 Framework Design

147 In order to strengthen the security models of a broad class of robust aggregation algorithms, we design  
 148 a modular template (Figure 2), which organizes aggregation algorithms in terms of three functions:

$$F^C : \mathcal{D} \times \mathcal{S} \times \Omega \rightarrow U \quad F^P : U \rightarrow V \quad F^R : V^m \rightarrow \Omega$$

149 The first function,  $F^C$ , represents the computation of client updates based on local data, state, and  
 150 global model parameters; accordingly,  $\mathcal{D}$  is the space of possible client datasets,  $\mathcal{S}$  is the space of local  
 151 states,  $\Omega$  is the space of global model parameters, and  $U$  is the space of client updates. In the trusted  
 152 single-server setting, each client computes  $F^C$  and sends their update  $u_i \in U$  to the server. Next  
 153 comes the server’s computation. We break the server’s work into two parts: a preprocessing function  
 154  $F^P$  and an aggregation function  $F^R$ . The former transforms each client update to a preprocessed  
 155 domain  $V$ , and the latter combines the preprocessed local updates into a global model update  $w \in \Omega$ .  
 156 Our primary contribution is the design of a protocol that lifts any robust aggregation algorithm  
 157 described in terms of these functions to a stronger security model. The security model in question is  
 158 secure against malicious clients *without* relying on a trusted server, all while retaining the protection  
 159 against poisoning attacks offered by the original algorithm.

160 **Protocol Description.** Peers carrying out a P2P Learning protocol (Figure 3) begin by randomly  
 161 selecting an aggregation committee, the size of which is parameterized to guarantee an honest

majority with all but negligible probability (see Appendix C for details). Since the committee is honest-majority, it can securely use the MPC (Secure Multi-Party Computation) and VSS (Verifiable Secret Sharing) schemes later in the protocol. All clients then compute local updates via  $F^C$ , and preprocess those updates via  $F^P$ . Peers secret share their updates with VSS, and pass shares to the aggregation committee. Each member of the committee receives a share of a local update from every peer. The committee uses distributed zero knowledge proofs to ensure that all updates are well-formed outputs of  $F^P$  – Section 4.2 discusses in detail how to do so with practical efficiency. Finally,  $F^R$  is computed by the aggregation committee by using the shares as input to a malicious-secure MPC protocol, and committee members send the resulting global model update to all peers.

**Strengthened Security Model.** In the single-server setting, the computation of  $F^R$  is handled by a single party. This makes it vulnerable to tampering – a malicious server may breach client confidentiality, omit updates from certain clients, modify updates, or simply make arbitrary changes to the global model. Our framework lifts aggregation algorithms to a security model where none of that is possible. Distributing the computation of  $F^R$  to an honest-majority committee equipped with malicious-secure MPC means that  $F^R$  is computed with guaranteed correctness and that no information about the local updates is leaked in the process. Further, using VSS guarantees that no committee member can breach the confidentiality of client updates before the computation of  $F^R$ , and that it is impossible to modify client updates before the computation of  $F^R$  without being caught (except with negligible probability). Further, since the committee is majority-honest, all peers can guarantee the correctness of the received global update by taking the majority result received from the committee members.

**Obtaining Practical Efficiency.** It is possible to strengthen the security model of almost any distributed computation by simply running it inside of a generalized MPC protocol, but doing so usually results in unbearable computational overhead since MPC substantially amplifies the cost of most operations. A key challenge that the present study surmounts is strengthening security whilst maintaining the efficiency necessary to scale to real-world collaborative learning scenarios. The design choices we employ while formulating our protocol make this possible. For example, in applications of robust aggregation with a trusted single-server, the role of the server is typically executed by a data center with high compute capabilities. In such a setting it is beneficial to minimize client-side computation and shift the compute responsibility to the server wherever possible.

In contrast, collaborative learning with no trusted parties requires a committee to aggregate client updates, and operations performed in MPC by the committee are especially *costly*. Thus it becomes beneficial to offload as much of the computation as possible to the client-side. Our template (Figure 2) and protocol (Figure 3) do this by separating the trusted server’s work into two parts,  $F^P$  and  $F^R$ , and shifting the work of computing  $F^P$  to the *clients*. This dramatically reduces the computational burden of the aggregation committee, but introduces potential concerns about the correctness of the underlying aggregation algorithm. Namely, in the trusted server setting  $F^P$  is guaranteed to be computed correctly since it is executed by a trusted party, but a malicious client may introduce arbitrary faults into the computation of  $F^P$ . To prevent this while maintaining confidentiality, one *could* use a zero-knowledge proof to guarantee that  $F^P$  was computed correctly, however this would introduce substantial computational overhead. We achieve a much more efficient result by instead verifying that each peer’s local update is *well-formed* – that it properly falls within the preprocessed domain  $V$ . We observe that if  $F^P$  has a certain property, which we call *computational surjectivity*, verifying that the update is within  $V$  is just as good as verifying correct computation of  $F^P$ , even though the former comes at substantially lower cost.

## 4.2 Computational Surjectivity

Our key insight is that by leveraging the properties of robust aggregation, we can relax certain requirements on the correctness of  $F^P$ . These relaxed requirements allow us to offload computation of  $F^P$  to the client-side, while also avoiding the computational overhead of a full zero-knowledge proof that  $F^P$  was computed correctly.

A robust aggregation algorithm guarantees that even when adversaries provide arbitrary values as the output of  $F^C$ , a satisfactory output of  $F^R$  will be computed. Accordingly, we observe that as long as *some* valid output of  $F^C$  maps to each client’s output of  $F^P$ , the final global update will be computed properly. Thus if  $F^P$  is a surjective function (i.e. if  $\forall v \in V, \exists u \in U : v = F^P(u)$ ), it is only necessary to verify that  $v_i \in V$  for all client updates  $v_i$  in order to correctly compute  $F^R$ .

### Secure P2P Learning Against Malicious and Poisonous Adversaries

**Protocol:**

1. The clients randomly select an aggregation committee  $C \subset \{P_i\}_{i \in [m]}$ .
2. Each client  $P_i$  applies local computation  $\mathbf{u}_i \leftarrow F^C(\text{data}, \text{st}, \mathbf{w})$ .
3. For each client  $P_i$ , compute  $\mathbf{v}_i \leftarrow F^P(\mathbf{u}_i)$ .
4.  $P_i$  secret shares  $\mathbf{v}_i$  to obtain  $[\mathbf{v}_i]$  and sends one share to each  $P_j \in C$ .
5. If  $F^P$  is not computationally surjective,  $P_i$  uses Distributed Zero Knowledge (DZK) to prove to the committee  $C$  that  $\mathbf{v}_i$  is correctly computed from some  $\mathbf{u}_i$  of  $P_i$ 's choice. Otherwise,  $P_i$  uses DZK to prove that  $\mathbf{v}_i \in V$ .
6. If  $\text{Domain}(F^R) \neq \text{Image}(F^P)$ ,  $P_i$  uses DZK to prove to the committee  $C$  that  $\mathbf{v}_i \in \text{Image}(F^P)$ .
7. All committee members  $P_j \in C$  input shares  $[\mathbf{v}_i]$  for all  $i \in [n]$  to a  $|C|$ -party computation protocol in order to compute  $\mathbf{w} \leftarrow F^R(\{\mathbf{v}_i\}_{i \in [n]})$ . Committee members send  $\mathbf{w}$  to all clients.

Figure 3: **Main protocol outline for the malicious setting.**

Below we specify a computational analogue of surjectivity—we require the preimage can be found in polynomial time so the whole protocol can achieve simulation security (Appendix C.2 has details).

**Definition 1** A function  $f : U \rightarrow V$  is computationally surjective if there is a probabilistic polynomial-time algorithm  $\mathcal{A} : V \rightarrow U$  such that for any  $v \in V$ , we have  $f(\mathcal{A}(v)) = v$ .

In the general case where we have no guarantees on the structure of  $F^P$ , peers must prove in zero knowledge that  $\mathbf{v}_i$  is the result of a valid computation of  $F^P$  (step 5 of fig. 3). But if  $F^P$  is computationally surjective, then all possible  $\mathbf{v}_i \in V$  are implicitly the output of some computation of  $F^P$ . Thus in this case it only becomes necessary to prove that the shares of each peers' input reconstructs a point within  $V$ .

The security of this protocol in the malicious setting is stated as Theorem 1 and proven in Appendix C.2.

**Theorem 1** For any single-server robust aggregation algorithm described in  $(F^C, F^P, F^R)$  as in Figure 2, the protocol described in Figure 3 is a secure P2P learning protocol against malicious clients and servers when the underlying MPC scheme is secure.

## 5 Lifting Robust-Aggregation Algorithms to a Malicious-Security Model

Having discussed how a single-server robust aggregation with a computationally surjective  $F^P$  can be lifted to the malicious peer-to-peer setting with high efficiency, we apply this principle to the design of malicious-secure versions of three popular robust aggregation algorithms: robust stochastic aggregation (RSA) [25], centered clipping (CC) [22], and FLTrust (FLT) [10] in the peer-to-peer setting.

### 5.1 Instantiating RSA in Malicious-Secure Framework

Robust stochastic aggregation (RSA) is a lightweight algorithm for Byzantine-robust convex optimization [25] (see Appendix C.3.1 for a summary). We observe that it can be lifted to the malicious security model with high efficiency with very few modifications to the algorithm: it is computationally surjective (which we show formally in Appendix C) and the underlying MPC can be efficiently instantiated.

In RSA peer updates are the sign of the difference between each parameter of the local and global models. In other words, the  $F^P$  of RSA gives  $V = \{-1, 1\}^d$ , where  $d$  is the number of parameters in the model. Thus, it is sufficient for peers to prove in zero-knowledge that their updates are in the set

246  $V = \{-1, 1\}^d$ . This can be accomplished efficiently by having each peer represent their update as  $d$   
 247 shares of binary values. The committee can perform a distributed zero knowledge (DZK) proof that  
 248 a shared  $x$  is binary-valued by constructing shares of  $x \cdot (1 - x)$  and revealing it to be zero. These  
 249 proofs can be batched together for a substantial improvement in efficiency. In particular, for every  
 250 shared value  $x_i$ , parties uniformly sample a random value  $r_i$ , and locally construct shares of the sum  
 251  $\sum r_i \cdot (x_i \cdot (1 - x_i))$ . The parties then reconstruct the sum – if it is 0, then each of the  $(x_i \cdot (1 - x_i))$   
 252 components must have been 0 with all but negligible probability. For a more detailed treatment of  
 253 this technique, see [9].

254 During the computation of  $F^R$ , the committee needs only to sum the shares and send out the  
 255 reconstructed sum. The actual value of the summed updates in  $\{-1, 1\}$  is implicitly given by the sum  
 256 of the binary values (if the sum of the binary values is  $x$ , simply take  $2x - m$ ).

## 257 5.2 Instantiating CC in Malicious-Secure Framework

258 Centered clipping with momentum (CC) is a robust aggregation algorithm that ensures protection  
 259 against time-coupled poisoning attacks [22] (see Appendix C for a summary). To lift it to our  
 260 improved security model with practical efficiency, we construct a computationally surjective variant  
 261 of the CC algorithm. Namely, while canonical CC clips local updates using the  $\ell_2$  norm, we use the  
 262  $\ell_\infty$  norm.<sup>1</sup> In other words, we clip the gradients to a  $\tau$ -box rather than a  $\tau$ -ball. This modification  
 263 admits a computationally surjective  $F^P$  with an efficient DZK proof that a client update is within  
 264 the valid domain. In particular, we take  $V = [0, 2^\theta - 1]^d$ . Then in  $F^P$  we scale, round, and map  
 265 clipped gradient updates to be within this domain. Here  $\theta$  is a public constant large enough to limit  
 266 discretization error of local updates during scaling – in experiments with CC we set  $\theta$  to 32 in order  
 267 to align with 32-bit fixed-point numbers. Smaller values of  $\theta$  will increase protocol efficiency, at the  
 268 expense of higher discretization error during rounding and mapping in  $F^P$  step 3. The computational  
 269 surjectivity of this  $F^P$  follows from a similar argument to Lemma 2 (see Appendix C).

270 **DZK Proof of Valid Update.** We specify that local updates  $v_i$  are submitted as vectors of the  
 271 individual component bits of the processed gradient update. This means that each bit will be  
 272 individually secret shared, which allows the committee to verify whether each one is binary-valued  
 273 (using the same DZK technique described above for the RSA protocol). Since we scaled each update  
 274 to fit within a  $2^\theta$ -sized  $d$ -dimensional box, the  $d$  sets of  $\theta$  binary values in the update trivially encode  
 275 a point within the box. Thus, a proof that each component of the bitwise update is binary-valued  
 276 equates to a proof that the update is in  $V$ .

277 The global update is aggregated by summing the bits at each position of the client update vectors.  
 278 The sums are reconstructed and sent directly to all clients. They implicitly encode the updated global  
 279 parameters  $w'$ , which are recovered via client-side computation in order to keep the computation of  
 280  $F^R$  light-weight. Details of our malicious-secure Centered Box Clipping protocol can be found in  
 281 Figure 8 (in Appendix).

## 282 5.3 Instantiating FLTrust in Malicious-Secure Framework

283 FLTrust (FLT) is a robust aggregation algorithm that uses a trusted dataset to filter out poisoned  
 284 updates [10] (see Appendix C for a summary). As with CC, we construct a tailored variant of FLT  
 285 that admits a computationally surjective  $F^P$  to improve efficiency. In particular we rotate and scale  
 286 the “root” update  $g_0$  to be a unit vector aligned with the x-axis. This allows us to take  $V$  to be the  
 287 set of unit vectors in the half-space defined by a non-negative x-coordinate. As such,  $F^P$  involves  
 288 scaling and rotating client updates so that the angle between them and  $g_0$  is preserved. Similarly to  
 289 CC, we encode client updates as  $\theta$ -bit fixed point numbers. In our benchmarks for FLT, we set  $\theta$  to  
 290 16 to compensate for the increased memory demands of this protocol. We use a committee size of  
 291 121 in order to enable multiplication of secret shared values (see Appendix C for details).

292 **DZK Proof of Valid Update.** As in CC, the magnitudes of local updates  $v_i$  are submitted as shares  
 293 of each bit in the binary representation of each fixed-point number. Clients additionally submit shares  
 294 encoding sign for each parameter, with the exception of the x-coordinate, which is assumed to be

<sup>1</sup>The theoretical robustness guarantees proven for centered clipping by Karimireddy et al. [22] cover clipping  
 for the  $\ell_p$  norm for arbitrary choice of real numbers  $p \geq 1$ , but do not extend to the  $\ell_\infty$  norm. We show  
 empirically that centered clipping with the  $\ell_\infty$  norm achieves similar model fidelity against known attacks  
 in Appendix C.

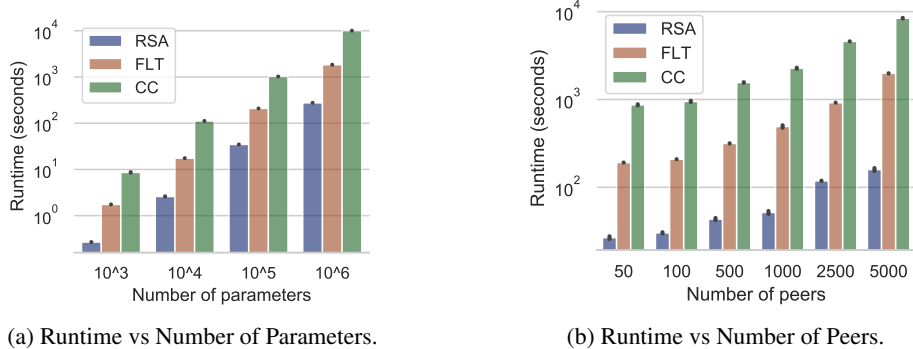

Figure 5: **Computational Efficiency vs Number of Parameters and Peers.** We report CPU wall-clock time for the execution of the aggregation step of our protocol – the computation of  $F^R$  in a single training round. The runtime performance of the algorithms (RSA, FLT, and CC) scales linearly with the number of parameters and peers. When modifying parameters we use a total of 100 peers (left subfigure) and  $10^5$  parameters set when changing the number of peers (right subfigure). For RSA and CC, the aggregation committee size is set to 46, and for FLT it is set to 121 in order to accommodate the secret share multiplications of the protocol (see Appendix C for details).

always non-negative. We use the previously described technique to verify that the shares encoding magnitude are binary-valued. We use a similar technique to verify that shares encoding sign are in the set  $\{-1, 1\}$  (i.e. we reveal  $(b+1)(b-1)$  to be zero using a batch check). Further, we verify that submitted updates are unit length by constructing shares of  $\langle \bar{g}_i, \bar{g}_i \rangle - C$ , where  $C$  is the squared length of a unit vector represented as a  $\theta$ -bit fixed-point number. Revealing this quantity to be zero verifies in zero-knowledge that  $\bar{g}_i$  was indeed unit length.

## 6 Verifying Empirical Efficacy and Efficiency

Our empirical evaluation focuses on exploring three major axes: (1) the Byzantine robustness of our implementations due to modifications we introduced, (2) the computational efficiency of our protocol, and (3) the tradeoff between computational efficiency and Byzantine robustness. To this end, we center our comparisons on robust stochastic aggregation (RSA), Centered Clipping (CC), and FLTrust (FLT) but remark that our framework is compatible with other (potentially future) Byzantine robust algorithms as well. We demonstrate the practical efficiency of our case studies in the P2P Learning framework while maintaining the same robustness of the algorithms as in their clear versions.

### 6.1 Security Does not Impact Robustness

We verify if the properties of the robust aggregation algorithms hold after the required modifications to lift them to the malicious setting, e.g., switching to fixed point numerical precision. In Figure 4, we use the IID MNIST dataset and 20 peers, of which there are 10 malicious workers. We compare the robustness of CC against the ALIE (A Little Is Enough) attack [1] before and after lowering CC’s numerical precision. We observe that the algorithm preserves its robustness despite the required changes. We also present corresponding additional studies (e.g. comparison between  $\ell_2$  and  $\ell_\infty$  norm for CC) in Appendix C. We observe that all the modified algorithms, namely CC, FLT, and RSA exhibit comparable performance to the original algorithms.

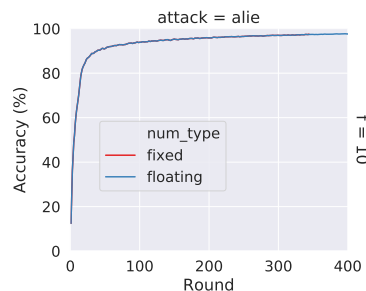

Figure 4: **Fixed vs floating-point numerical precision for CC.**

### 6.2 Scaling of Computational Efficiency

Because P2P learning algorithms typically require upwards of 1000 rounds of the protocol to converge, it is a necessity to have an efficient protocol. In Figure 5, we analyze the two major factors influencing this: the size of the vector (ML model) being aggregated (denoted as the number of parameters), and



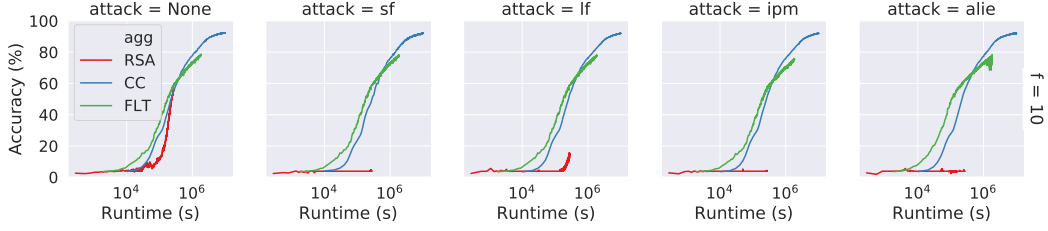

Figure 6: **Byzantine Robustness of Doubly Robust Protocols** for iid EMNIST. We compare RSA, FLT, and CC after their instantiations in our framework. A cohort size of 50 peers is used, of which there are 10 malicious workers. We consider four attacks and have a baseline without any malicious workers. We run each algorithm until its completion. CC achieves the highest final accuracy. FLT and CC converge much faster than RSA.

the number of peers participating in the collaborative learning. We observe much better performance for RSA than other algorithms per training round. This results from a more concise form of the information exchanged between peers in the case of RSA, where local updates from each peer are represented as an array of bits. In contrast, the model updates sent between peers in FLT or CC are always encoded as fixed points, 16 for FLT vs 32 for CC. The more efficient encoding of messages between peers in RSA provides a speedup of around  $\sim 30X$  in comparison to CC and  $\sim 6X$  over FLT. Our framework is able to scale efficiently to even 5000 participants, for which we observe a linear growth in terms of the elapsed time per training round. Similarly, the computation time scales linearly for RSA, FLT, and CC, with the number of parameters. We further compare the communication cost between frameworks in Appendix C.

### 6.3 End-to-end Protocol Evaluation in Presence of Attacks

We estimate the accuracy and runtime of the modified algorithms in the presence of different types of attacks in Figure 6. We compute the number of rounds to convergence, and use the per-round CPU time for computation of  $F^R$  in each algorithm, to estimate overall training runtime and accuracy for EMNIST (and similar results for MNIST in Appendix C). We plot the test accuracy (%) on the y-axis and the x-axis represents the estimated CPU time (measured in seconds, note that this is in the logarithmic scale) of the P2P training. We observe that in all cases, CC and FLT algorithms outperform RSA in terms of convergence speed and achieve higher final accuracy. Note that the overall convergence speed is decided by both the number of iterations of training and the cost of each iteration. Although RSA is faster to compute for one iteration due to reduced information exchanged in each iteration, it requires much more iterations than CC and FLT, and hence slower to converge. When considering only utility, CC also outperforms FLT consistently; however, under computation constraints, it is often the case that FLT is more efficient than CC. This is primarily because we use a fixed-point length ( $\theta$ ) of 16 bits in the experiments for FLT, but 32 bits for CC.

## 7 Conclusions

The benefits of collaborative learning make it an attractive new paradigm that is increasingly adopted in many domains, such as the financial sector, *e.g.*, to enable collaboration between banks. However, there are many risks associated with collaboration due to clients or server(s) acting maliciously. Malicious clients can submit corrupted updates which leads to the failure of creating a useful shared model. Conversely, the leakage of the client’s local data when contributing model updates has been demonstrated to be particularly strong when a central party cannot be trusted to orchestrate the collaborative learning protocol. To mitigate these issues, we propose Peer-to-Peer Learning that provides a doubly robust protocol against malicious clients and server(s) to train a shared model *without* a central party. We prove the cryptographic security of our protocol, providing the necessary security guarantees. Our novel framework is designed as a generic compiler that can efficiently convert robust aggregation algorithms to the P2P learning setting with the guaranteed malicious-secure protocol. We show empirically that the generated protocols retain their robustness guarantees. This generic approach can be applied to many (possibly future) aggregation algorithms.

## References

- [1] Moran Baruch, Gilad Baruch, and Yoav Goldberg. A little is enough: Circumventing defenses for distributed learning. 2019. doi: 10.48550/ARXIV.1902.06156. URL <https://arxiv.org/abs/1902.06156>.
- [2] James Bell, Adrià Gascón, Tancrède Lepoint, Baiyu Li, Sarah Meiklejohn, Mariana Raykova, and Cathie Yun. Acorn: Input validation for secure aggregation. *Cryptology ePrint Archive*, 2022.
- [3] James Henry Bell, Kallista A. Bonawitz, Adrià Gascón, Tancrède Lepoint, and Mariana Raykova. Secure single-server aggregation with (poly)logarithmic overhead. In *Proceedings of the 2020 ACM SIGSAC Conference on Computer and Communications Security, CCS '20*, page 1253–1269, New York, NY, USA, 2020. Association for Computing Machinery. ISBN 9781450370899. doi: 10.1145/3372297.3417885. URL <https://doi.org/10.1145/3372297.3417885>.
- [4] Battista Biggio, Blaine Nelson, and Pavel Laskov. Poisoning attacks against support vector machines, 2012. URL <https://arxiv.org/abs/1206.6389>.
- [5] Peva Blanchard, El Mahdi El Mhamdi, Rachid Guerraoui, and Julien Stainer. Machine learning with adversaries: Byzantine tolerant gradient descent. *Advances in Neural Information Processing Systems*, 30, 2017.
- [6] Franziska Boenisch, Adam Dziedzic, Roei Schuster, Ali Shahin Shamsabadi, Ilia Shumailov, and Nicolas Papernot. When the curious abandon honesty: Federated learning is not private, 2021. URL <https://arxiv.org/abs/2112.02918>.
- [7] Franziska Boenisch, Adam Dziedzic, Roei Schuster, Ali Shahin Shamsabadi, Ilia Shumailov, and Nicolas Papernot. Is federated learning a practical pet yet? 2023.
- [8] Keith Bonawitz, Vladimir Ivanov, Ben Kreuter, Antonio Marcedone, H Brendan McMahan, Sarvar Patel, Daniel Ramage, Aaron Segal, and Karn Seth. Practical secure aggregation for privacy-preserving machine learning. In *proceedings of the 2017 ACM SIGSAC Conference on Computer and Communications Security*, pages 1175–1191, 2017.
- [9] Dan Boneh, Elette Boyle, Henry Corrigan-Gibbs, Niv Gilboa, and Yuval Ishai. Zero-knowledge proofs on secret-shared data via fully linear pcps. *Cryptology ePrint Archive*, Paper 2019/188, 2019. URL <https://eprint.iacr.org/2019/188>. <https://eprint.iacr.org/2019/188>.
- [10] Xiaoyu Cao, Minghong Fang, Jia Liu, and Neil Zhenqiang Gong. Fltrust: Byzantine-robust federated learning via trust bootstrapping. *arXiv preprint arXiv:2012.13995*, 2020.
- [11] PETs Prize Challenge. <https://www.drivendata.org/competitions/98/nist-federated-learning-1/page/522/>, 2023. URL <https://www.drivendata.org/competitions/98/nist-federated-learning-1/page/522/>.
- [12] Wei-Ning Chen, Christopher A Choquette-Choo, Peter Kairouz, and Ananda Theertha Suresh. The fundamental price of secure aggregation in differentially private federated learning. *arXiv preprint arXiv:2203.03761*, 2022.
- [13] Christopher A. Choquette-Choo, Natalie Dullerud, Adam Dziedzic, Yunxiang Zhang, Somesh Jha, Nicolas Papernot, and Xiao Wang. CaPC Learning: Confidential and Private Collaborative Learning. In *International Conference on Learning Representations*, 2021. URL [https://openreview.net/forum?id=h2EbJ4\\_wMVq](https://openreview.net/forum?id=h2EbJ4_wMVq).
- [14] Amrita Roy Chowdhury, Chuan Guo, Somesh Jha, and Laurens van der Maaten. Eiffel: Ensuring integrity for federated learning. *arXiv preprint arXiv:2112.12727*, 2021.
- [15] Jiashi Feng, Huan Xu, and Shie Mannor. Distributed robust learning, 2015.
- [16] Jonas Geiping, Hartmut Bauermeister, Hannah Dröge, and Michael Moeller. Inverting gradients—how easy is it to break privacy in federated learning? *arXiv preprint arXiv:2003.14053*, 2020.

- [17] Jonas Geiping, Hartmut Bauermeister, Hannah Dröge, and Michael Moeller. *Inverting Gradients – How easy is it to break privacy in federated learning?* 2020. 23 pages, 20 figures. The first three authors contributed equally.
- [18] Rachid Guerraoui, Sébastien Rouault, et al. The hidden vulnerability of distributed learning in byzantium. In *International Conference on Machine Learning*, pages 3521–3530. PMLR, 2018.
- [19] Lie He, Sai Praneeth Karimireddy, and Martin Jaggi. Byzantine-robust learning on heterogeneous datasets via resampling. 2020.
- [20] Peter Kairouz, Ziyu Liu, and Thomas Steinke. The distributed discrete gaussian mechanism for federated learning with secure aggregation. In *International Conference on Machine Learning*, pages 5201–5212. PMLR, 2021.
- [21] Peter Kairouz, H Brendan McMahan, Brendan Avent, Aurélien Bellet, Mehdi Bennis, Arjun Nitin Bhagoji, Kallista Bonawitz, Zachary Charles, Graham Cormode, Rachel Cummings, et al. Advances and open problems in federated learning. *Foundations and Trends® in Machine Learning*, 14(1–2):1–210, 2021.
- [22] Sai Praneeth Karimireddy, Lie He, and Martin Jaggi. Learning from history for byzantine robust optimization. In *International Conference on Machine Learning*, pages 5311–5319. PMLR, 2021.
- [23] Sai Praneeth Karimireddy, Lie He, and Martin Jaggi. Byzantine-robust learning on heterogeneous datasets via bucketing. In *International Conference on Learning Representations*, 2022. URL <https://openreview.net/forum?id=jXKKDEi5vJt>.
- [24] Nikola Konstantinov and Christoph Lampert. Robust learning from untrusted sources. In Kamalika Chaudhuri and Ruslan Salakhutdinov, editors, *Proceedings of the 36th International Conference on Machine Learning*, volume 97 of *Proceedings of Machine Learning Research*, pages 3488–3498. PMLR, 09–15 Jun 2019. URL <https://proceedings.mlr.press/v97/konstantinov19a.html>.
- [25] Liping Li, Wei Xu, Tianyi Chen, Georgios B Giannakis, and Qing Ling. Rsa: Byzantine-robust stochastic aggregation methods for distributed learning from heterogeneous datasets. In *Proceedings of the AAAI Conference on Artificial Intelligence*, volume 33, pages 1544–1551, 2019.
- [26] Yehuda Lindell and Ben Riva. Cut-and-choose based two-party computation in the online/offline and batch settings. *IACR Cryptol. ePrint Arch.*, 2014:667, 2014.
- [27] Brendan McMahan, Eider Moore, Daniel Ramage, Seth Hampson, and Blaise Agüera y Arcas. Communication-efficient learning of deep networks from decentralized data. In *Artificial intelligence and statistics*, pages 1273–1282. PMLR, 2017.
- [28] H Brendan McMahan, Daniel Ramage, Kunal Talwar, and Li Zhang. Learning differentially private recurrent language models. *arXiv preprint arXiv:1710.06963*, 2017.
- [29] Adam Paszke, Sam Gross, Francisco Massa, Adam Lerer, James Bradbury, Gregory Chanan, Trevor Killeen, Zeming Lin, Natalia Gimelshein, Luca Antiga, Alban Desmaison, Andreas Kopf, Edward Yang, Zachary DeVito, Martin Raison, Alykhan Tejani, Sasank Chilamkurthy, Benoit Steiner, Lu Fang, Junjie Bai, and Soumith Chintala. Pytorch: An imperative style, high-performance deep learning library. In H. Wallach, H. Larochelle, A. Beygelzimer, F. d’Alché-Buc, E. Fox, and R. Garnett, editors, *Advances in Neural Information Processing Systems 32*, pages 8024–8035. Curran Associates, Inc., 2019. URL <http://papers.neurips.cc/paper/9015-pytorch-an-imperative-style-high-performance-deep-learning-library.pdf>.
- [30] Le Trieu Phong, Yoshinori Aono, Takuya Hayashi, Lihua Wang, and Shiho Moriai. Privacy-preserving deep learning: Revisited and enhanced. pages 100–110. Springer, Singapore, 2017. doi: 10.1007/978-981-10-5421-1\_9. URL [https://link.springer.com/content/pdf/10.1007%2F978-981-10-5421-1\\_9.pdf](https://link.springer.com/content/pdf/10.1007%2F978-981-10-5421-1_9.pdf).

- [31] Krishna Pillutla, Sham M Kakade, and Zaid Harchaoui. Robust aggregation for federated learning. *arXiv preprint arXiv:1912.13445*, 2019.
- [32] Muhammad Shayan, Clement Fung, Chris JM Yoon, and Ivan Beschastnikh. Biscotti: A ledger for private and secure peer-to-peer machine learning. *arXiv preprint arXiv:1811.09904*, 2018.
- [33] Victor Shoup. A library for doing number theory. URL <https://libnt1.org>.
- [34] Xiao Wang, Samuel Ranellucci, and Jonathan Katz. Authenticated garbling and efficient maliciously secure two-party computation. Cryptology ePrint Archive, Paper 2017/030, 2017. URL <https://eprint.iacr.org/2017/030>. <https://eprint.iacr.org/2017/030>.
- [35] Zhibo Wang, Mengkai Song, Zhifei Zhang, Yang Song, Qian Wang, and Hairong Qi. Beyond inferring class representatives: User-level privacy leakage from federated learning. In *IEEE INFOCOM 2019 - IEEE Conference on Computer Communications*. IEEE, 2019. doi: 10.1109/infocom.2019.8737416.
- [36] Stefanie Warnat-Herresthal, Hartmut Schultze, Krishnaprasad Lingadahalli Shastry, Sathyanarayanan Manamohan, Saikat Mukherjee, Vishesh Garg, Ravi Sarveswara, Kristian Händler, Peter Pickkers, N Ahmad Aziz, et al. Swarm learning for decentralized and confidential clinical machine learning. *Nature*, 594(7862):265–270, 2021.
- [37] Cong Xie, Oluwasanmi Koyejo, and Indranil Gupta. Generalized byzantine-tolerant sgd, 2018. URL <https://arxiv.org/abs/1802.10116>.
- [38] Cong Xie, Sanmi Koyejo, and Indranil Gupta. Fall of empires: Breaking byzantine-tolerant sgd by inner product manipulation, 2019. URL <https://arxiv.org/abs/1903.03936>.
- [39] Dong Yin, Yudong Chen, Ramchandran Kannan, and Peter Bartlett. Byzantine-robust distributed learning: Towards optimal statistical rates. In *International Conference on Machine Learning*, pages 5650–5659. PMLR, 2018.
- [40] Hongxu Yin, Arun Mallya, Arash Vahdat, Jose M. Alvarez, Jan Kautz, and and Pavlo Molchanov. *See through Gradients: Image Batch Recovery via GradInversion*. 2021. URL [https://openaccess.thecvf.com/content/cvpr2021/html/yin\\_see\\_through\\_gradients\\_image\\_batch\\_recovery\\_via\\_gradinversion\\_cvpr\\_2021\\_paper.html](https://openaccess.thecvf.com/content/cvpr2021/html/yin_see_through_gradients_image_batch_recovery_via_gradinversion_cvpr_2021_paper.html).
- [41] Bo Zhao, Konda Reddy Mopuri, and Hakan Bilen. *iDLG: Improved Deep Leakage from Gradients*. 2020.
- [42] Yang Zhao, Jun Zhao, Linshan Jiang, Rui Tan, Dusit Niyato, Zengxiang Li, Lingjuan Lyu, and Yingbo Liu. Privacy-preserving blockchain-based federated learning for iot devices. *IEEE Internet of Things Journal*, PP:1–1, 08 2020. doi: 10.1109/JIOT.2020.3017377.
- [43] Ligeng Zhu and Song Han. Deep leakage from gradients. In *Federated Learning*, pages 17–31. Springer, Cham, 2020. doi: 10.1007/978-3-030-63076-8\_2. URL [https://link.springer.com/chapter/10.1007/978-3-030-63076-8\\_2](https://link.springer.com/chapter/10.1007/978-3-030-63076-8_2).

## 497 A Broader Impacts

498 The goal of our work is to provide a protocol that enables collaborative learning with guaranteed  
499 confidentiality of client data and fidelity of the trained model, even when both clients and server(s)  
500 can act maliciously. A potential positive impact of this work is increased privacy and accountability in  
501 machine learning systems. One potentially negative impact could be the degradation of performance  
502 (in terms of compute time, communication overhead, or additional storage) for legitimate users.  
503 However, as shown in our experimental results, we are still able to cater to 100s of users with a model  
504 size of 1 mln parameters.

## 505 B Limitations

506 We provided a reference implementation of our protocol for three popular robust aggregation algo-  
507 rithms, namely RSA, FTL, and CC. We hope that our framework will be easy to extend to future  
508 robust aggregation methods. We acknowledge that operating in the malicious threat model also  
509 increases the cost of computation, communication, and storage, in comparison to the fully trusted  
510 environment or an honest-but-curious threat model.

## 511 C Additional Information

512 We further present additional information, experimental results, as well as a comparison between  
513 RSA, Centered Clipping with Momentum, and FL Trust.

### 514 C.1 Committee Size

515 The main protocol proceeds by first selecting a subset from the pool of peers which will be responsible  
516 for aggregating the updates of all the peers. This subset is termed the *aggregation committee*. To  
517 guarantee security, the size of the committee  $m$  has to be adjusted based on the number of corrupted  
518 parties. Let us denote the set of corrupted parties as  $\mathcal{B}$  with  $|\mathcal{B}| = b$ . If the committee members are  
519 selected randomly, then with probability  $p = b/n$ , a given committee member is an adversary. To  
520 ensure security in the malicious case, we need the aggregation committee to have an honest majority  
521 except with negligible probability (i.e. occurring with probability less than  $2^{-40}$  as in [26, 34]). We  
522 can assess the probability of this event by modeling the number of corrupted peers in a uniform  
523 sample as a binomial random variable  $X$  with bias  $p = \frac{b}{n}$  and  $m$  trials. In particular, we are interested  
524 in values of  $p$  and  $m$  for which  $\Pr[X \geq n/2] < 2^{-\frac{n}{40}}$ . These values can be computed from the  
525 cumulative density function of the binomial distribution. Assuming a 10% adversarial corruption  
526 threshold (i.e. setting  $p = 1/10$ ), we obtain a committee size of 46. We use this committee size for  
527 experiments with RSA and CC. With FLTrust, in order to accommodate secret share multiplications  
528 with Shamir secret sharing, we guarantee  $\Pr[X \geq n/3] < 2^{-40}$ , which gives a committee size of  
529 121.

### 530 C.2 Security Proof

531 We provide a proof of Theorem 1 (malicious security of Figure 3) below.

532 *Proof:* We prove the security of the protocol by constructing a simulator interacting with the  
533 adversaries controlling a subset of the parties.

534 1 The simulator plays the role of coin flipping and return a uniform aggregation committee. If the  
535 committee contains more adversary than the allowed threshold, the simulator aborts.

536 The probability of simulator aborts in this step is negligible given the committee size and threshold.

537 2-4 The simulator obtains shares of  $v_i$  from the adversary and sends them random shares on behalf of  
538 the honest parties.

539 5 If  $F^P$  is not computationally surjective, The simulator plays the role of DZK to obtain the  
540 adversary's input  $u_i$ . If  $F^P$  is computationally surjective, the simulator use  $v_i$  to compute some  
541  $u_i$ .

542 The simulator's running time is always polynomial in this step either because efficient extraction  
543 from DZK or because of the definition of computational surjectivity.

544 6 The simulator plays the role of DZK and check if  $v_i$  is in the image of  $F^P$  and aborts if it is not  
 545 the case.

546 7 The simulator sends  $u_i$  to  $\mathcal{F}_{P2PL}$  and gets back the new updates; it then plays the role of  $\mathcal{F}_{MPC}$   
 547 and sends back the new updates to the adversary.

548 □

### 549 C.3 Instantiating Our Malicious Framework

#### 550 C.3.1 Malicious-Secure P2P RSA.

551 **Overview of Single-Server RSA.** Single-server Byzantine-robust stochastic aggregation (RSA) [25]  
 552 is a set of subgradient based algorithms for robust aggregation. The key component of the method  
 553 is a regularization term incorporated into the objective function to make learning robust. To enable  
 554 graceful handling of heterogeneous worker datasets, each client  $i$  maintains a local set of model  
 555 parameters  $x_i^k$  whilst working together to optimize the global model parameters  $w^k$  at a step  $k$ . At  
 556 each step, clients compute a parameter update which takes into account their local data, their prior  
 557 local model, as well as the global model parameters. The server receives the local client updates  
 558 and uses the regularized objective to obtain a robust aggregate update. Client and server updates,  
 559 respectively, are given by the equations:

$$x_i^{k+1} = x_i^k - \eta^k (\nabla F(x_i^k, \xi_i^k) + \lambda \text{sign}(x_i^k - w^k)) \quad (1)$$

$$w^{k+1} = w^k - \eta^k \left( \nabla f_0(w^k) + \lambda \left( \sum_{i \in [n]} \text{sign}(w^k - x_i^k) \right) \right) \quad (2)$$

560 where  $\eta$  is a decaying learning rate hyper parameter,  $\xi$  is a sampling of the local client dataset,  $F(\cdot, \cdot)$   
 561 is the loss function,  $f(\cdot, \cdot)$  is the robust ( $\ell_2$ ) regularization term,  $\lambda$  is a hyper parameter controlling  
 562 the weighting of the robustness term, the  $\text{sign}$  is performed element-wise, and  $[n]$  is the set of clients.

563 **Lifting RSA to the P2P setting.** To cast RSA into our framework, we first observe that  
 564  $\sum_{i \in [n]} \text{sign}(w^k - x_i^k)$  is the only term of the server's update that requires input from the clients.  
 565 Thus we limit the work of the committee solely to computing this term, and the rest of the work is  
 566 done locally. We instantiate RSA for our framework in Figure 7.

567 In the  $F^C$  (client update computation) part of the RSA protocol, each peer receives the global model  
 568 parameters  $w^k$ . It computes local parameter update  $x_i^{k+1}$  based on the global model, the local  
 569 model  $x_i^k$ , and the local gradient  $\nabla F$ . In the  $F^P$  (update preprocessing) part of the protocol, peers  
 570 compute the sign of the difference between their local parameters and the global model parameters  
 571  $\text{sign}(w^k - u_i)$ , resulting in a bit vector  $v_i$  (one bit per model parameter). In the  $F^R$  (aggregation)  
 572 part of the protocol, the committee members receive secret shares of  $\text{sign}(w^k - x_i^k)$  from each  
 573 participant. We observe that RSA can be lifted to the malicious security model with high efficiency:  
 574 it is provably computational surjective and the underlying MPC can be efficiently instantiated.

575 **Computational Surjectivity.** Recall that in RSA peer updates are the sign of the difference between  
 576 each parameter of the local and global models (Figure 7). In other words, the  $F^P$  of RSA gives  
 577  $V = \{-1, 1\}^d$ , where  $d$  is the number of parameters in the model. In the single-server model of  
 578 RSA [25] and in Figure 7, poisonous peers can choose arbitrary  $u_i$  before  $F^P$  is computed, which  
 579 gives  $v_i = \text{sign}(w^k - u_i)$ . Now we are ready to show the computational surjectivity of this  $F^P$ .

580 **Lemma 1**  $F^P$  described in Figure 7 is a computationally surjective function.

*Proof:* Fix an arbitrary point  $v = (v_1, \dots, v_d) \in V = \{-1, 1\}^d$ . We can construct  $u \in U$  that  $F^P$   
 maps to  $v$  by first fixing some arbitrary  $w^k = (w_1, \dots, w_d)$ , and letting  $u = (u_1, \dots, u_d)$  such that

$$u_j = w_j - v_j \text{ for each } j \in [d].$$

581 Clearly the  $F^P$  of RSA  $v_i = \text{sign}(w^k - u_i)$  maps  $u$  to the arbitrary  $v$ . So  $F^P$  is computationally  
 582 surjective. □

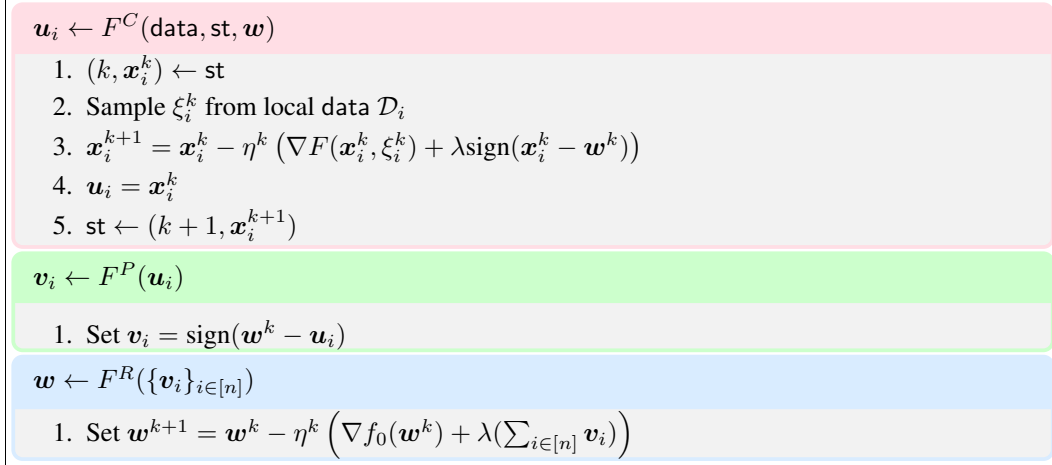

Figure 7: **P2P Learning with RSA.**  $F^R$  can be computed efficiently by performing only  $\sum_{i \in [n]} v_i$  on the committee side. The rest of the terms are public, so the remainder of the update can be computed locally.

583 **Details of the cryptographic protocol.** Thus, following Figure 3, it is sufficient for peers to prove in  
 584 zero knowledge that their updates are in the set  $V = \{-1, 1\}^d$ . This can be accomplished efficiently  
 585 by having each peer represent their update as  $d$  shares of binary values.

586 The committee can verify that a shared  $x$  is binary-valued by constructing shares of  $x \cdot (1 - x)$  and  
 587 revealing it to be zero. We implement this step efficiently by batching the binary-value DZK proofs  
 588 together. That is, for every shared value  $x_i$ , parties uniformly sample a random value  $r_i$ , and locally  
 589 construct shares of the sum  $\sum r_i \cdot (x_i \cdot (1 - x_i))$ . The parties then reconstruct the sum – if it is 0,  
 590 then each of the  $(x_i \cdot (1 - x_i))$  components must have been 0 with all but negligible probability. For  
 591 a more detailed treatment of this technique, see [9].

592 During the computation of  $F^R$ , the committee needs only to sum the shares and send out the  
 593 reconstructed sum. The actual value of the summed updates in  $\{-1, 1\}$  is implicitly given by the sum  
 594 of the binary values (if the sum of the binary values is  $x$ , simply take  $2x - m$ ). The updated global  
 595 model parameters can then be obtained via local computation of Equation 2.

596 **Computational Surjectivity.** In RSA, peer updates are the sign of the difference between each  
 597 parameter of the local and global models (Figure 7). The  $F^P$  of RSA gives  $V = \{-1, 1\}^d$ , where  $d$   
 598 is the number of parameters in the model. In the single-server model of RSA [25] and in Figure 7,  
 599 poisonous peers can choose arbitrary  $u_i$  before  $F^P$  is computed, which gives  $v_i = \text{sign}(w^k - u_i)$ .  
 600 Now we are ready to show the computational surjectivity of this  $F^P$ .

601 **Lemma 2**  $F^P$  described in Figure 7 is a computationally surjective function.

*Proof:* Fix an arbitrary point  $v = (v_1, \dots, v_d) \in V = \{-1, 1\}^d$ . We can construct  $u \in U$  that  $F^P$   
 maps to  $v$  by first fixing some arbitrary  $w^k = (w_1, \dots, w_d)$ , and letting  $u = (u_1, \dots, u_d)$  such that

$$u_j = w_j - v_j \text{ for each } j \in [d].$$

602 Clearly the  $F^P$  of RSA  $v_i = \text{sign}(w^k - u_i)$  maps  $u$  to the arbitrary  $v$ . So  $F^P$  is computationally  
 603 surjective.  $\square$

### 604 C.3.2 Malicious Secure P2P CC

605 **Overview of Single-Server Centered Clipping.** Centered Clipping [22] is a recent robust aggrega-  
 606 tion that ensures a high level robustness even when the noise distribution is not uni-modal (which is  
 607 assumed in many prior works.) It also provides better robustness when corrupted updates at different  
 608 rounds are correlated. Below we first discuss details of the algorithm and then how to express it in  
 609 our framework.

610 **Centered Clipping (no momentum):** Given the training iteration  $k$ , globally shared model  
 611 parameters  $w^k$ , local model parameters  $x_i^{k+1}$  in client  $i$ , and a radius  $\tau$ , CC using the  $\ell_2$ -norm

612 computes an updated weight vector as follows:

$$x_i^{k+1} = (x_i^{k+1} - w^k) \min \left( 1, \frac{\tau}{\|x_i^{k+1} - w^k\|_2} \right) \quad (3)$$

$$w^{k+1} = w^k + \frac{1}{n} \sum_{i=1}^n x_i^{k+1} \quad (4)$$

613 In Equation (3), we clip the parameters for each client  $i$ , and then aggregate them in Equation (4).

614 **Centered Clipping with Momentum:** In addition to the above, each non-Byzantine client  $i$  first  
 615 computes a gradient update  $\nabla F$  based on their mini-batch  $\xi_i^k$  and the current global weights  $w^k$ .  
 616 Then, using the momentum parameter  $\beta$ , each client computes a momentum vector as shown in  
 617 Equation 5 (executed before Equation (3) and Equation (4)):

$$x_i^{k+1} = (1 - \beta) \nabla F(w^k, \xi_i^k) + \beta x_i^k \quad (5)$$

618 **Lifting CC to the P2P setting.** We bring CC into the P2P setting by placing the momentum  
 619 computation inside  $F^C$ , the clipping operation inside  $F^P$ , and the aggregation of clipped updates in  
 620  $F^R$ . The clipping operation is performed on individual client updates, and thus can be performed on  
 621 the client side. Further, as in RSA we note that  $F^R$  is a linear function, and thus can be computed  
 622 efficiently using the homomorphic addition and scalar multiplication properties of Shamir secret  
 623 sharing.

624 Centered Clipping does not naturally give us a surjective  $F^P$ . Of note, if a corrupted peer supplies  
 625 a value of  $v_i$  that is outside of the  $\tau$ -ball surrounding  $w$ , the global update will be computed  
 626 incorrectly and the model fidelity guarantees will be broken. To avoid this possibility, we make a  
 627 slight modification to the CC algorithm. Namely, we clip local updates using the  $\ell_\infty$  norm rather than  
 628 the  $\ell_2$  norm. In other words, we clip the gradients to a  $\tau$ -box rather than a  $\tau$ -ball. The computation of  
 629 the global update thus becomes

$$w_{k+1} = w_k + \frac{1}{m} \sum_{i=1}^m \min(\tau, \max(-\tau, x_i - w_k)) \quad (6)$$

630 This modification admits a computationally surjective  $F^P$  with an efficient DZK proof that a client  
 631 update is within the valid domain. In particular, we take  $V = [0, 2^\theta - 1]^d$ . Then in  $F^P$  we scale,  
 632 round, and map clipped gradient updates to be within this domain. Here  $\theta$  is a public constant large  
 633 enough to limit discretization error of local updates during scaling – in the present study we set  $\theta$   
 634 to 32 in order to align with 32-bit fixed-point numbers. Smaller values of  $\theta$  will increase protocol  
 635 efficiency, at the expense of higher discretization error during rounding and mapping in  $F^P$  step 3.  
 636 Computational surjectivity of this  $F^P$  follows from a similar argument to Lemma 2.

637 **DZK Proof of Valid Update.** We specify that local updates  $v_i$  are submitted as vectors of the  
 638 individual component bits of the processed gradient update. This means that each bit will be  
 639 individually secret shared, which allows the committee to verify whether each one is binary-valued  
 640 (using the same DZK technique described above for the RSA protocol). Since we scaled each update  
 641 to fit within a  $2^\theta$ -sized  $d$ -dimensional box, the  $d$  sets of  $\theta$  binary values in the update trivially encode  
 642 a point within the box. Thus, a proof that each component of the bitwise update is binary-valued  
 643 equates to a proof that the update is in  $V$ .

644 The global update is aggregated by summing the bits at each position of the client update vectors.  
 645 The sums are reconstructed and sent directly to all clients. They implicitly encode the updated global  
 646 parameters  $w'$ , which are recovered via client-side computation in order to keep the computation of  
 647  $F^R$  light-weight. Details of our malicious-secure Centered Box Clipping protocol can be found in  
 648 Figure 8.

### 649 C.3.3 Malicious Secure P2P FLTrust

650 **Overview of Single-Server FLTrust.** Single-server FLTrust (abbreviated FLT) [10] is a robust  
 651 aggregation algorithm that bootstraps trust using a clean “root” dataset maintained by the server.



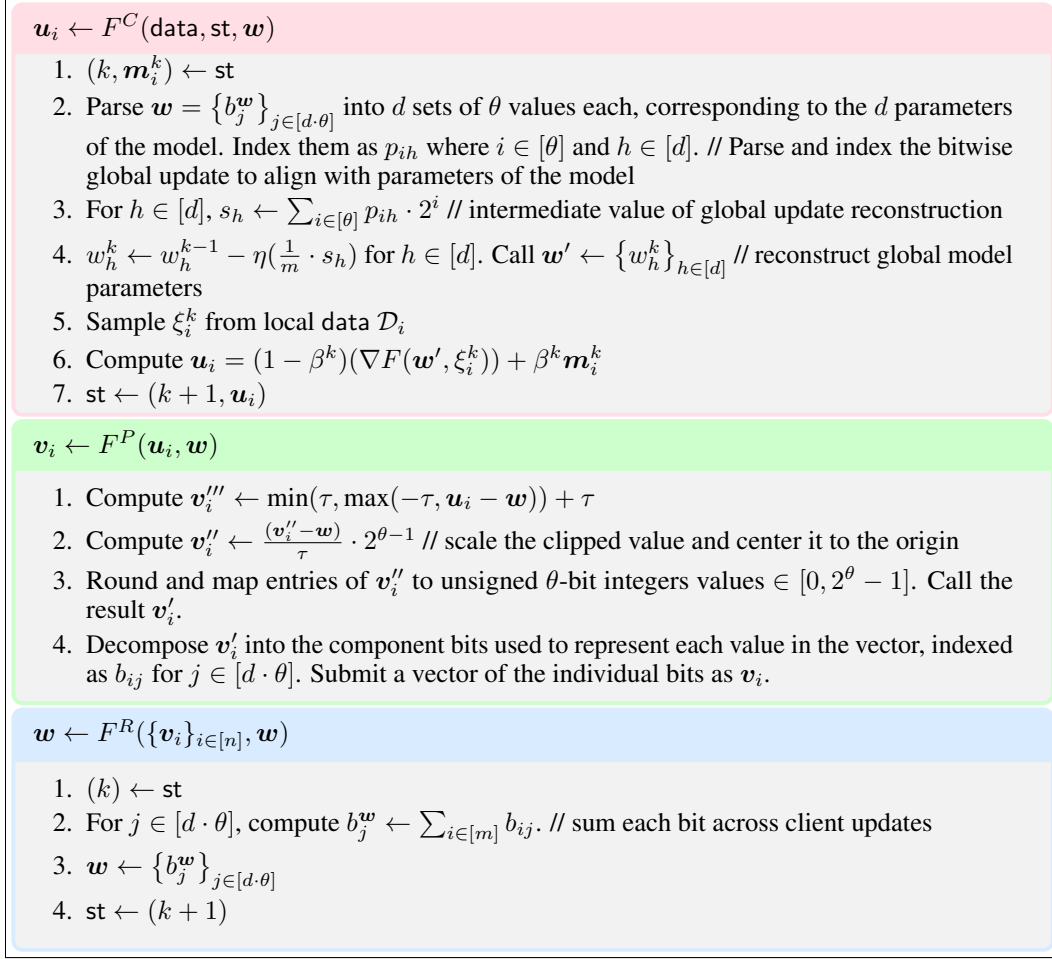

Figure 8: Centered Box Clipping. By clipping to a box and scaling that box to size  $2^\theta$ , this modification of Centered Clipping achieves computational surjectivity and an efficient proof to verify that shared peer updates are inside  $V$ .

652 During each iteration, the server compares client gradients against the gradient computed from the  
 653 root dataset. Specifically, the server computes a ‘trust score’ (TS) for each client gradient  $i \in [m]$ ,  
 654 which it uses to compute a weighted sum of normalized gradients which makes up the final aggregate.  
 655 The trust score and update aggregation are given by the following equations:

$$TS_i = \text{ReLU} \left( \frac{\langle g_i, g_0 \rangle}{||g_i|| ||g_0||} \right) \quad (7)$$

$$g = \frac{1}{\sum_{j=1}^m TS_j} \sum_{i=1}^m TS_i \cdot \bar{g}_i \quad (8)$$

$$w = w + \alpha \cdot g \quad (9)$$

656 Where  $TS_i$  is the trust score for client  $i$ ,  $g_i$  is the local gradient for client  $i$ ,  $g_0$  is the gradient  
 657 computed from the root dataset, and  $\bar{g}_i$  is the gradient of client  $i$  normalized to have the same length  
 658 as  $g_0$ . As a brief explanation of the framework, the trust score acts as a clipped version of the cosine  
 659 similarity – the greater the angle between  $g_i$  and  $g_0$ , the smaller the scaling factor that weights  $\bar{g}_i$  in  
 660 the weighted sum. The ReLU ensures that any  $g_i$  with a negative cosine similarity is clipped to 0, and  
 661 thus contributes no weight to the sum.

662 **Lifting FLT to the P2P setting.** We begin by assuming that the root dataset  $D_0$  is publicly accessible,  
 663 so that all clients may compute the root update  $g_0$  locally, in addition to their local update  $g_i$  inside of  
 664  $F^C$ . In  $F^P$  we perform normalization and rotation to simplify the computation of Equations 7 and 8  
 665 in  $F^R$  (explained in more detail below). In  $F^R$ , we securely compute the trust score of each client

and the corresponding weighted sum of gradients. This weighted sum is submitted as the global update – computation of the updated model parameters is left to the clients as a post-processing step.

The representation of  $v_i$  is chosen to enable efficient computation of  $F^R$  and of DZK proofs of update validity. In detail, we perform a rotation of  $g_i$  and  $g_0$  such that  $g_0$  is aligned with the  $x$ -axis (and the angle between  $g_0$  and  $g_i$  is preserved). We also normalize such that  $g_0$  and  $g_i$  are unit-length. Further, when submitting client updates we use a representation that can only encode a non-negative  $x$ -coordinate (by decomposing each entry of  $g'_i$  into a sign and magnitude, and only accepting a magnitude – and not a sign bit – for the  $x$ -coordinate). This canonical representation simplifies computation of the trust score. In particular, since  $g_0$  and  $g_i$  are normalized to unit vectors, computation of the cosine similarity  $\frac{\langle g_i, g_0 \rangle}{\|g_i\| \|g_0\|}$  simplifies to  $\langle g_i, g_0 \rangle$ , and since  $g_0$  is aligned with the  $x$ -axis, this further simplifies to selecting the  $x$ -coordinate of  $g_i$ . Further, we avoid taking the ReLU within  $F^R$  by choosing a representation of  $v_i$  that cannot represent a  $g_i$  with negative  $x$ -coordinate, and specifying that any honest party whose local gradient has negative  $x$ -coordinate supplies an update that will have 0 weight during the computation of Equation 8 (we use the symbol  $\perp$  as a placeholder for such an update – in practice, this can be any arbitrary unit vector with 0 in the  $x$ -coordinate). Thus computation of the trust score during  $F^R$  is simplified to taking the  $x$ -coordinate of  $g'_i$ .

The chosen representation of  $v_i$  constrains the image of  $F^P$  to the set of unit vectors with non-negative  $x$ -coordinates. If we restrict the codomain of  $F^P$  to this set, we achieve computational surjectivity. This follows from a simple argument:

*Proof:* Fix an arbitrary point  $v$  in the set of unit vectors with non-negative  $x$ -coordinates. Fix an arbitrary  $g_0$ . Let  $M$  be a rotation matrix that rotates  $g_0$  to the  $x$ -axis. Consider a client update  $u$  such that  $Mu$  is on the line extending from the origin to  $v$ . By definition,  $F^P$  maps  $u$  to  $v$ .  $\square$

Finally, we construct DZK proofs to verify that  $v_i$  falls inside the set of unit vectors with non-negative  $x$ -coordinates.

**DZK Proof of Valid Update.** As in RSA and CC, we perform a batch check that all submitted shares are binary-valued (see previous sections for details). We additionally perform a DZK proof that all updates are unit length, by constructing shares of  $\langle g'_i, g'_i \rangle - C$  and revealing them to be 0, where  $C$  is a constant which encodes the square of a  $\theta$ -bit fixed point number with unit magnitude. We batch check these proofs by obtaining shared random field elements  $r_i$  and constructing shares of the sum  $\sum r_i \cdot (\langle g'_i, g'_i \rangle - C)$ , and finally revealing them to be 0 (i.e. using the same technique as described in the binary-value batch check for RSA). We also perform a DZK proof to ensure that the sign bits are in  $\{-1, 1\}$  by computing shares of  $(b-1)(b+1)$  and revealing them to be 0 – this check is batched in the same way as the previous checks.

## C.4 Experimental Design

While lifting robust aggregation algorithms to the malicious-secure P2P Learning security model, we make small changes to the algorithms to tailor them for efficiency in the setting. Thus, in order to evaluate P2P Learning, we design experiments to test (1) the effectiveness (in terms of accuracy and robustness) of these tailored algorithms, as well as (2) the efficiency of their implementation as cryptographic protocols. These goals are performed using distinct code bases: we used PyTorch to benchmark accuracy and robustness, and we used the NTL package [33] in C++ to implement the local computation for the aggregation steps of our malicious-secure framework.

### C.4.1 Accuracy and Robustness Experiments

To benchmark the robustness of the different aggregation protocols evaluated in the paper, we ran experiments under each to train a central model in a collaborative machine learning setting with a cohort size of 50 participants and varying numbers of malicious workers (0, 10, 23). 4 attacks, namely bit flip (bf) [37], label flip (lf) [4], inner product manipulation (ipm) [38], and "a little is enough" (alie) [1], were evaluated. In all cases, we computed the testing accuracy as a function of the number of rounds of training.

MNIST (Digits) and EMNIST (Letters) datasets were used as the datasets with the data being evenly divided among the peers. The model architecture from [23] (with 1.2M parameters) was used for

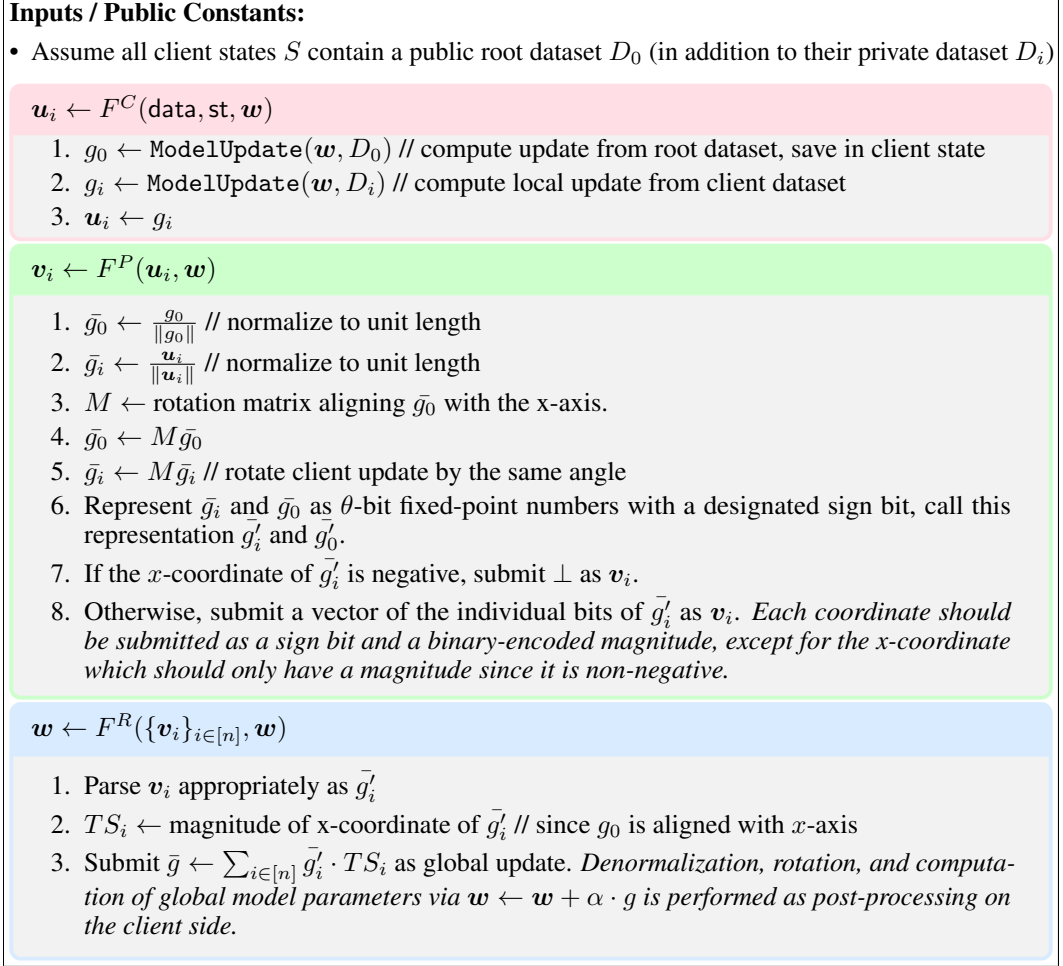

Figure 9: FLTrust.

717 MNIST and this architecture was modified to have 26 neurons in the last layer for EMNIST. During  
718 training, each client uses a local mini-batch of size 32 at each round and a learning-rate of 0.01.  
719 The training experiments were repeated over two random seeds. The PyTorch [29] framework was  
720 used for all experiments.

#### 721 C.4.2 Computational Efficiency Experiments

722 To benchmark the efficiency of our framework, we wrote code to perform all local computation  
723 steps necessary to run the aggregation step for a single committee member ( $F^R$ ) of malicious-  
724 secure P2P RSA, CC, and FLT. We used an `m5.metal` instance on Amazon EC2 to obtain the  
725 benchmarks reported in Figure 5. Each benchmark reports the mean runtime of 3 trials – trials were  
726 run concurrently in separate threads.

#### 727 C.5 Communication Cost

728 In Table 2 we calculate the communication cost of our framework for CC and RSA and compare it to  
729 the cost of the standard Secure Aggregation protocol. For a fair comparison between the methods, we  
730 do not include messages related to clients sending public keys to the server or the server broadcasting  
731 the keys to all the clients.

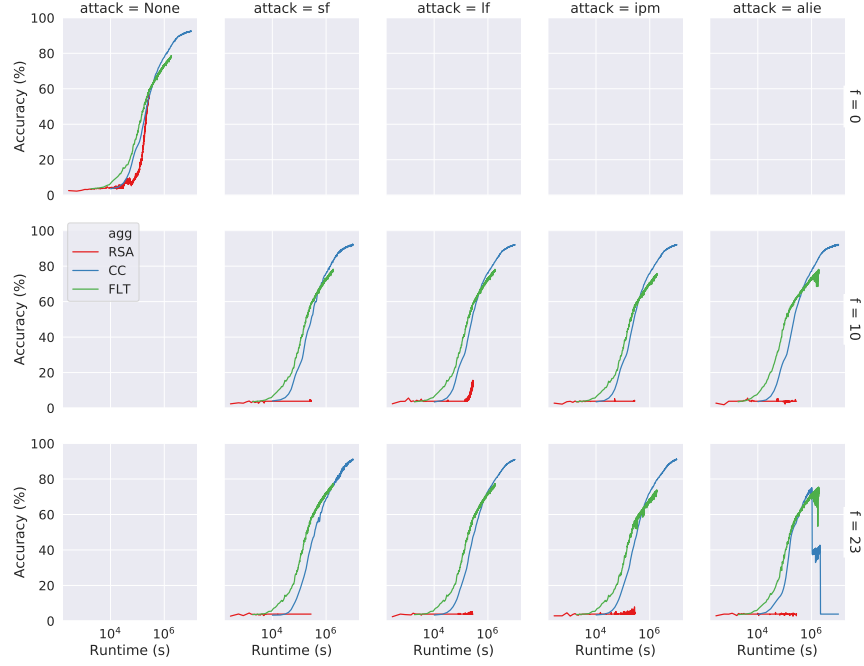

Figure 10: **Byzantine Robustness of Doubly Robust Protocols** for iid EMNIST. We compare RSA and CC after their instantiations in our framework. A cohort size of 50 peers is used.  $f$  is the number of malicious workers. We run each algorithm until its completion.

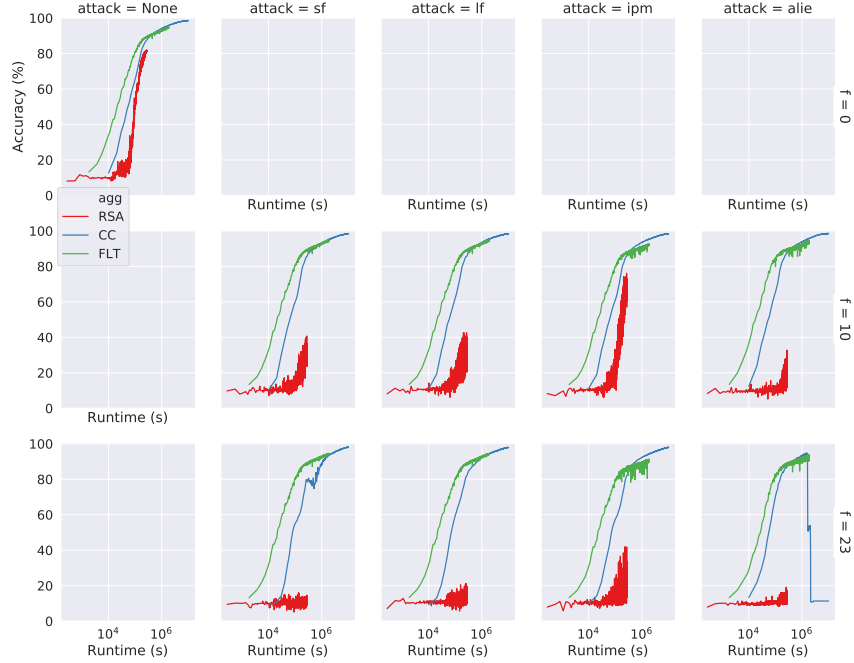

Figure 11: **Byzantine Robustness of Doubly Robust Protocols** for iid MNIST. We compare RSA and CC after their instantiations in our framework. A cohort size of 50 peers is used.  $f$  is the number of malicious workers. We run each algorithm until its completion.

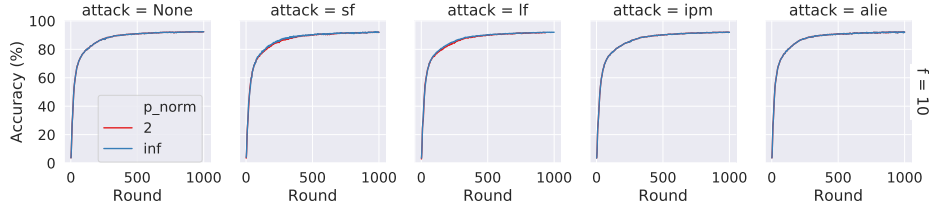

Figure 12:  $\ell_2$  vs  $\ell_\infty$  norm for CC for iid EMNIST.

Table 2: **Comparison of Communication Cost between Aggregation Protocols.** We present the communication cost (in GB) of exchanging updates for a model of size  $10^6$  parameters (as this is a minimal practical scenario as indicated in [3]). SecAgg denotes the Secure Aggregation, while DR P2P is our Doubly Robust Peer-to-Peer protocol. (\*the reported communication cost is per server or an aggregation committee member).

| METHOD           | COST PER |            |           |
|------------------|----------|------------|-----------|
|                  | CLIENT   | SERVER(S)* | ALL PEERS |
| SECAGG v1 SHS[8] | 26       | 2638       | 52772     |
| DR-P2P+RSA       | 3        | 286        | 13454     |
| DR-P2P+CC        | 90       | 9164       | 430531    |
